# Supplementary material for: Long‐lasting correction of in vivo LTP and cognitive deficits of mice modelling Down syndrome with an α5‐selective GABAA inverse agonist
Source: PubMed Central journal article supplement (PMC7042104; doi:10.1111/bph.14903), 2020-01-09
Supplement: BPH-177-1106-s001.pdf [file BPH-177-1106-s001.pdf]

Figure 1B

## Double pulse

| Test per                    | Condition group 1 | Condition group 2 | All pairwise multiple comparison procedures (Holm-Sidak method) |         |       |                         | Normality Test (Shapiro-Wilk) | Equal Variance Test (Brown-Forsythe) | Two way repeated measures ANOVA (One factor repetition, Interval) |
|-----------------------------|-------------------|-------------------|-----------------------------------------------------------------|---------|-------|-------------------------|-------------------------------|--------------------------------------|-------------------------------------------------------------------|
|                             |                   |                   | mean difference                                                 | t value | p     | Statistical differences |                               |                                      |                                                                   |
| Treatment x Interval=10 ms  | wt Vehicle        | Ts65Dn vehicle    | 17 708                                                          | 0.823   | 0.415 | No                      | Passed, $p=0.06$              | Passed, $p=0.816$                    | F(5,70)=0.471, $p=0.797$                                          |
| Treatment x Interval=20 ms  | wt Vehicle        | Ts65Dn vehicle    | 13 741                                                          | 0.638   | 0.526 | No                      |                               |                                      |                                                                   |
| Treatment x Interval=40 ms  | wt Vehicle        | Ts65Dn vehicle    | 4 969                                                           | 0.231   | 0.818 | No                      |                               |                                      |                                                                   |
| Treatment x Interval=100 ms | wt Vehicle        | Ts65Dn vehicle    | 11 387                                                          | 0.529   | 0.599 | No                      |                               |                                      |                                                                   |
| Treatment x Interval=200 ms | wt Vehicle        | Ts65Dn vehicle    | 0.747                                                           | 0.0347  | 0.972 | No                      |                               |                                      |                                                                   |
| Treatment x Interval=200 ms | wt Vehicle        | Ts65Dn vehicle    | 5 908                                                           | 0.274   | 0.785 | No                      |                               |                                      |                                                                   |

Figure 1 C-F

## LTP Test-evolution

| Test per | Condition group 1 | Condition group 2 | Normality Test (Shapiro-Wilk)                                                                                                  | Equal Variance Test (Brown-Forsythe) | Two way repeated measures ANOVA (One factor repetition, Interval) |
|----------|-------------------|-------------------|--------------------------------------------------------------------------------------------------------------------------------|--------------------------------------|-------------------------------------------------------------------|
|          |                   |                   |                                                                                                                                |                                      |                                                                   |
|          | Wt Vehicle        | Ts65Dn vehicle    | Too many comparisons to be indicated individually. Overall, 45 measured times (from Baseline to Day 6) by 6 group comparisons. |                                      |                                                                   |
|          | Wt+a5IA           | Ts65Dn a5IA       |                                                                                                                                |                                      |                                                                   |
|          | Ts65Dn vehicle    | Ts65Dn a5IA       |                                                                                                                                |                                      |                                                                   |

Figure 1 G

## LTP Test- groups x days

| Test per | Condition group 1 | Condition group 2 | All pairwise multiple comparison procedures (Holm-Sidak method) |         |        |                         | Normality Test (Shapiro-Wilk) | Equal Variance Test (Brown-Forsythe) | ANOVA             |                            |
|----------|-------------------|-------------------|-----------------------------------------------------------------|---------|--------|-------------------------|-------------------------------|--------------------------------------|-------------------|----------------------------|
|          |                   |                   | mean difference                                                 | t value | p      | Statistical differences |                               |                                      |                   |                            |
| Day 1    | Treatment         | Wt Vehicle        | Wt+a5IA                                                         | 67.66   | 8.829  | $p<0.001$               | Yes                           | Passed, $p=0.399$                    | Passed, $p=0.130$ | F(3,96)=116.026, $p<0.001$ |
|          |                   | Wt Vehicle        | Ts65Dn vehicle                                                  | 140.994 | 18.399 | $p<0.001$               | Yes                           |                                      |                   |                            |
|          |                   | Wt Vehicle        | Ts65Dn a5IA                                                     | 88.695  | 11.574 | $p<0.001$               | Yes                           |                                      |                   |                            |
|          |                   | Wt+a5IA           | Ts65Dn vehicle                                                  | 73.334  | 9.570  | $p<0.001$               | Yes                           |                                      |                   |                            |
|          |                   | Wt+a5IA           | Ts65Dn a5IA                                                     | 21.035  | 2.745  | $p=0.007$               | Yes                           |                                      |                   |                            |
|          |                   | Ts65Dn vehicle    | Ts65Dn a5IA                                                     | 52.299  | 6.825  | $p<0.001$               | Yes                           |                                      |                   |                            |
| Day 2    | Treatment         | Wt Vehicle        | Wt+a5IA                                                         | 27.151  | 4.223  | $p<0.001$               | Yes                           | Passed, $p=0.008$                    | Passed, $p=0.711$ | F(3,96)=79.507, $p<0.001$  |
|          |                   | Wt Vehicle        | Ts65Dn vehicle                                                  | 66.717  | 10.377 | $p<0.001$               | Yes                           |                                      |                   |                            |
|          |                   | Wt Vehicle        | Ts65Dn a5IA                                                     | 31.921  | 4.965  | $p<0.001$               | Yes                           |                                      |                   |                            |
|          |                   | Wt+a5IA           | Ts65Dn vehicle                                                  | 93.868  | 14.6   | $p<0.001$               | Yes                           |                                      |                   |                            |
|          |                   | Wt+a5IA           | Ts65Dn a5IA                                                     | 59.072  | 9.188  | $p<0.001$               | Yes                           |                                      |                   |                            |
|          |                   | Ts65Dn vehicle    | Ts65Dn a5IA                                                     | 34.796  | 5.412  | $p<0.001$               | Yes                           |                                      |                   |                            |
| Day 3    | Treatment         | Wt Vehicle        | Wt+a5IA                                                         | 93.839  | 11.142 | $p<0.001$               | Yes                           | Failed, $p<0.05$                     | Passed, $p=0.435$ | F(3,96)=71.018, $p<0.001$  |
|          |                   | Wt Vehicle        | Ts65Dn vehicle                                                  | 21.742  | 2.581  | $p=0.023$               | Yes                           |                                      |                   |                            |
|          |                   | Wt Vehicle        | Ts65Dn a5IA                                                     | 20.218  | 2.401  | $p=0.018$               | Yes                           |                                      |                   |                            |
|          |                   | Wt+a5IA           | Ts65Dn vehicle                                                  | 115.581 | 13.723 | $p<0.001$               | Yes                           |                                      |                   |                            |
|          |                   | Wt+a5IA           | Ts65Dn a5IA                                                     | 73.621  | 8.741  | $p<0.001$               | Yes                           |                                      |                   |                            |
|          |                   | Ts65Dn vehicle    | Ts65Dn a5IA                                                     | 41.96   | 4.982  | $p<0.001$               | Yes                           |                                      |                   |                            |
| Day 4    | Treatment         | Wt Vehicle        | Wt+a5IA                                                         | 87.052  | 8.063  | $p<0.001$               | Yes                           | Failed, $p<0.05$                     | Passed, $p=0.102$ | F(3,96)=36.95, $p<0.001$   |
|          |                   | Wt Vehicle        | Ts65Dn vehicle                                                  | 17.797  | 1.648  | $p=0.103$               | No                            |                                      |                   |                            |
|          |                   | Wt Vehicle        | Ts65Dn a5IA                                                     | 37.918  | 3.512  | $p=0.001$               | Yes                           |                                      |                   |                            |
|          |                   | Wt+a5IA           | Ts65Dn vehicle                                                  | 104.849 | 9.711  | $p<0.001$               | Yes                           |                                      |                   |                            |
|          |                   | Wt+a5IA           | Ts65Dn a5IA                                                     | 49.134  | 4.551  | $p<0.001$               | Yes                           |                                      |                   |                            |
|          |                   | Ts65Dn vehicle    | Ts65Dn a5IA                                                     | 55.715  | 5.16   | $p<0.001$               | Yes                           |                                      |                   |                            |
| Day 5    | Treatment         | Wt Vehicle        | Wt+a5IA                                                         | 145.338 | 15.106 | $p<0.001$               | Yes                           | Passed, $p=0.089$                    | Passed, $p=0.078$ | F(3,96)=93.359, $p<0.001$  |
|          |                   | Wt Vehicle        | Ts65Dn vehicle                                                  | 14.544  | 1.37   | $p=0.174$               | No                            |                                      |                   |                            |
|          |                   | Wt Vehicle        | Ts65Dn a5IA                                                     | 52.047  | 4.904  | $p<0.001$               | Yes                           |                                      |                   |                            |
|          |                   | Wt+a5IA           | Ts65Dn vehicle                                                  | 160.338 | 15.106 | $p<0.001$               | Yes                           |                                      |                   |                            |
|          |                   | Wt+a5IA           | Ts65Dn a5IA                                                     | 93.747  | 8.832  | $p<0.001$               | Yes                           |                                      |                   |                            |
|          |                   | Ts65Dn vehicle    | Ts65Dn a5IA                                                     | 66.591  | 5.274  | $p<0.001$               | Yes                           |                                      |                   |                            |
| Day 6    | Treatment         | Wt Vehicle        | Wt+a5IA                                                         | 159.562 | 15.179 | $p<0.001$               | Yes                           | Failed, $p<0.05$                     | Passed, $p=0.114$ | F(3,96)=114.507, $p<0.001$ |
|          |                   | Wt Vehicle        | Ts65Dn vehicle                                                  | 15.416  | 1.466  | $p=1.466$               | No                            |                                      |                   |                            |
|          |                   | Wt Vehicle        | Ts65Dn a5IA                                                     | 64.717  | 6.156  | $p<0.001$               | Yes                           |                                      |                   |                            |
|          |                   | Wt+a5IA           | Ts65Dn vehicle                                                  | 174.977 | 16.645 | $p<0.001$               | Yes                           |                                      |                   |                            |
|          |                   | Wt+a5IA           | Ts65Dn a5IA                                                     | 94.844  | 9.022  | $p<0.001$               | Yes                           |                                      |                   |                            |
|          |                   | Ts65Dn vehicle    | Ts65Dn a5IA                                                     | 80.133  | 7.623  | $p<0.001$               | Yes                           |                                      |                   |                            |

Figure 3

## Y maze

| Variable                  | Test per  | Condition group 1 | Condition group 2 | mean difference | 95 CI lower limit | 95 CI upper limit | 95 CI containing 0 | Normality Test (Shapiro-Wilk) | Equal Variance Test (Brown-Forsythe) | ANOVA    |                        |
|---------------------------|-----------|-------------------|-------------------|-----------------|-------------------|-------------------|--------------------|-------------------------------|--------------------------------------|----------|------------------------|
|                           |           |                   |                   |                 |                   |                   |                    |                               |                                      |          | Number of arms visited |
|                           | genotype  | Ts65Dn vehicle    | Ts65Dn a5IA       | -5.615          | -11.307           | 0.000             | yes                |                               |                                      |          |                        |
|                           |           | wt vehicle        | Ts65Dn vehicle    | 2.076           | -4.307            | 8.230             | yes                |                               |                                      |          |                        |
|                           |           | wt a5IA           | Ts65Dn a5IA       | -2.384          | -7.615            | 3.076             | yes                |                               |                                      |          |                        |
| % spontaneous alternation | Treatment | wt Vehicle        | wt a5IA           | 0.957           | -9.112            | 11.511            | yes                | Passed, $p=0.869$             | Failed, $p<0.050$                    | Not Done |                        |
|                           |           | Ts65Dn vehicle    | Ts65Dn a5IA       | 7.164           | 1.149             | 13.029            | no                 |                               |                                      |          |                        |
|                           |           | genotype          | wt vehicle        | Ts65Dn vehicle  | -12.691           | -20.766           | -4.757             |                               |                                      |          | no                     |
|                           |           |                   | wt a5IA           | Ts65Dn a5IA     | -6.485            | -15.607           | 1.934              |                               |                                      |          | yes                    |

Figure 2

## Novel object recognition

| Variable                                 | Test per  | Condition group 1 | Condition group 2 | mean difference | 95 CI lower limit | 95 CI upper limit | 95 CI containing 0 | Normality Test (Shapiro-Wilk) | Equal Variance Test (Brown-Forsythe) | ANOVA                    |                                          |
|------------------------------------------|-----------|-------------------|-------------------|-----------------|-------------------|-------------------|--------------------|-------------------------------|--------------------------------------|--------------------------|------------------------------------------|
|                                          |           |                   |                   |                 |                   |                   |                    |                               |                                      |                          | Habituation Mean distance travelled (cm) |
|                                          | genotype  | Ts65Dn vehicle    | Ts65Dn a5IA       | 84.237          | -50.003           | 226.345           | yes                |                               |                                      |                          |                                          |
|                                          |           | wt vehicle        | Ts65Dn vehicle    | 181.865         | 76.212            | 293.642           | no                 |                               |                                      |                          |                                          |
|                                          |           | wt a5IA           | Ts65Dn a5IA       | 46.287          | -57.464           | 165.232           | yes                |                               |                                      |                          |                                          |
| Acquisition Mean distance travelled (cm) | Treatment | wt Vehicle        | wt a5IA           | 169.321         | 74.158            | 272.476           | no                 | Failed, $p<0.050$             | Not Done                             | Not Done                 |                                          |
|                                          |           | Ts65Dn vehicle    | Ts65Dn a5IA       | 117.688         | -6.699            | 243.119           | yes                |                               |                                      |                          |                                          |
|                                          |           | genotype          | wt vehicle        | Ts65Dn vehicle  | 111.592           | 40.841            | 189.277            |                               |                                      |                          | no                                       |
|                                          |           |                   | wt a5IA           | Ts65Dn a5IA     | 31.854            | -50.465           | 135.625            |                               |                                      |                          | yes                                      |
| Test Mean distance travelled (cm)        | Treatment | wt Vehicle        | wt a5IA           | 95.451          | 24.270            | 167.624           | no                 | Failed, $p<0.050$             | Not Done                             | Not Done                 |                                          |
|                                          |           | Ts65Dn vehicle    | Ts65Dn a5IA       | 62.272          | -31.601           | 152.893           | yes                |                               |                                      |                          |                                          |
|                                          |           | genotype          | wt vehicle        | Ts65Dn vehicle  | 86.411            | 20.554            | 160.094            |                               |                                      |                          | no                                       |
|                                          |           |                   | wt a5IA           | Ts65Dn a5IA     | 24.538            | -52.939           | 131.935            |                               |                                      |                          | yes                                      |
| Recognition index                        | Treatment | wt Vehicle        | wt a5IA           | -1.293          | -21.331           | 18.353            | yes                | Passed, $p=0.869$             | Passed, $p=0.114$                    | F(1,50)=4.548, $p=0.038$ |                                          |
|                                          |           | Ts65Dn vehicle    | Ts65Dn a5IA       | 23.516          | 4.570             | 44.437            | no                 |                               |                                      |                          |                                          |
|                                          |           | genotype          | wt vehicle        | Ts65Dn vehicle  | -0.343            | -0.496            | -0.178             |                               |                                      |                          | no                                       |
|                                          |           |                   | wt a5IA           | Ts65Dn a5IA     | -0.0823           | -0.285            | 0.106              |                               |                                      |                          | yes                                      |

Figure 4

## Morris Water Maze

| Variable                  | Test per                        | Condition group 1 | Condition group 2 | mean difference | 95 CI lower limit | 95 CI upper limit | 95 CI containing 0 | Normality Test (Shapiro-Wilk) | Equal Variance Test (Brown-Forsythe) | ANOVA                         |
|---------------------------|---------------------------------|-------------------|-------------------|-----------------|-------------------|-------------------|--------------------|-------------------------------|--------------------------------------|-------------------------------|
|                           |                                 |                   |                   |                 |                   |                   |                    |                               |                                      |                               |
|                           | genotype                        | wt a5IA           | Ts65Dn a5IA       |                 |                   |                   |                    | Passed, $p=0.632$             | Passed, $p=0.643$                    | RM F(1,72)=3.035, $p=0.107$   |
| Distance (m)              | genotype                        | wt vehicle        | Ts65Dn vehicle    |                 |                   |                   |                    | Passed, $p=0.559$             | Passed, $p=0.832$                    | RM F(1,102)=12.375, $p=0.003$ |
|                           | genotype                        | wt a5IA           | Ts65Dn a5IA       |                 |                   |                   |                    |                               |                                      |                               |
| % distance in thigmotaxis | genotype                        | wt vehicle        | Ts65Dn vehicle    |                 |                   |                   |                    | Passed, $p=0.179$             | Passed, $p=0.181$                    | RM F(1,102)=17.225, $p<0.001$ |
|                           | Log 1+% distance in thigmotaxis | genotype          | wt a5IA           | Ts65Dn a5IA     |                   |                   |                    |                               |                                      |                               |
| Mean speed                | genotype                        | wt vehicle        | Ts65Dn vehicle    |                 |                   |                   |                    | Passed, $p=0.065$             | Passed, $p=0.240$                    | RM F(1,102)=1.616, $p=0.221$  |
|                           | Log 1-Mean speed                | genotype          | wt a5IA           | Ts65Dn a5IA     |                   |                   |                    |                               |                                      |                               |
| Probe test                | genotype                        | wt vehicle        | Ts65Dn vehicle    |                 |                   |                   |                    | Passed, $p=0.243$             | Passed, $p=0.079$                    | F(1,17)=4.531, $p=0.048$      |
|                           | genotype                        | wt a5IA           | Ts65Dn a5IA       |                 |                   |                   |                    |                               |                                      |                               |
