# Supplementary material for: Long‐lasting correction of in vivo LTP and cognitive deficits of mice modelling Down syndrome with an α5‐selective GABAA inverse agonist
Source: PubMed Central journal article supplement (PMC7042104; doi:10.1111/bph.14903), 2020-01-09

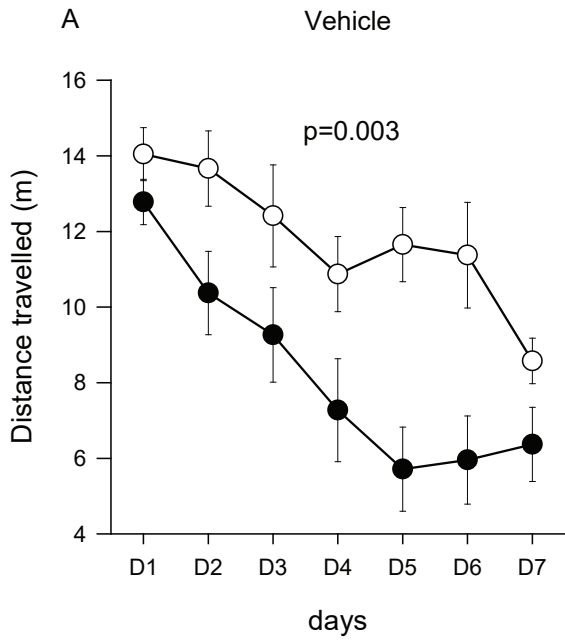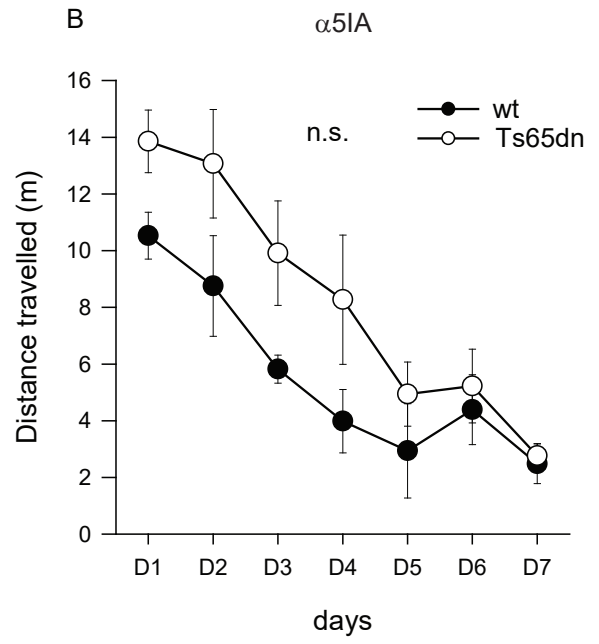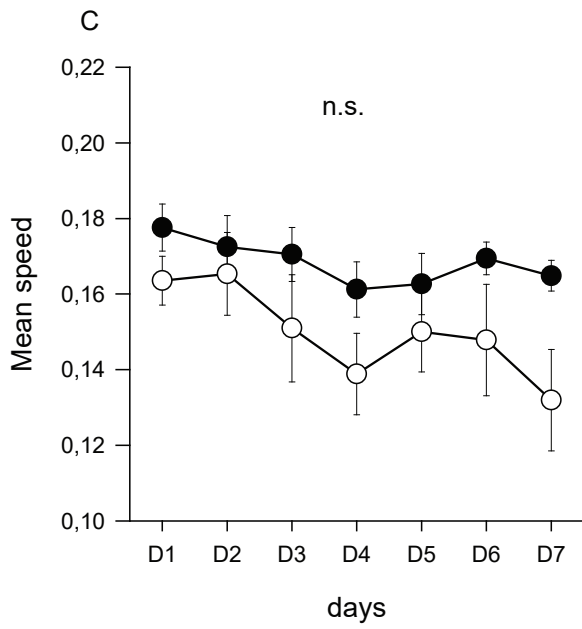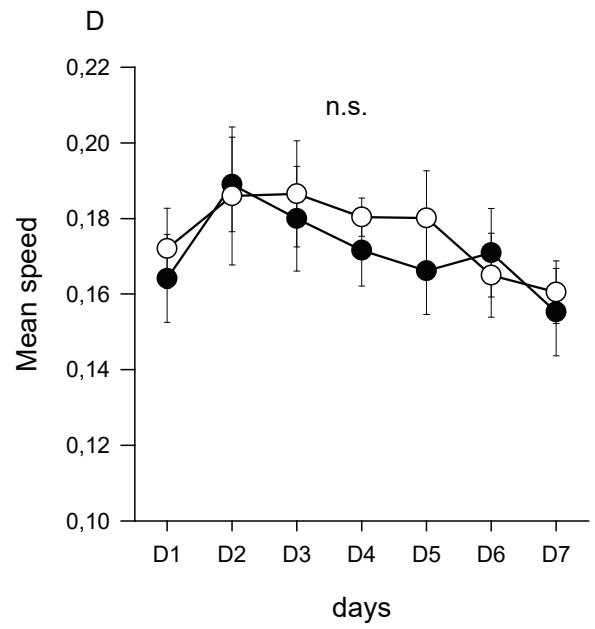

Supplement: BPH-177-1106-s002.pdf [file BPH-177-1106-s002.pdf]
